# Supplementary material
Source: Research Square preprint supplement (doi:10.21203/rs.3.rs-8692306/v1)
Supplement: Supplementary file 1 [file 1e90c97dc4cb05d71fa472c7.docx]

**Appendices**

Supplementary Tables

**Supplementary Table 1.** Acute Phase Profile: Comparison of Clinical Signs with Peak Bilirubin Levels, Age at Peak Bilirubin, and Birth Weight

|  | **Present** | | | | **Absent** | | | |
| --- | --- | --- | --- | --- | --- | --- | --- | --- |
| **Feature** | **N** | **Peak Bilirubin (mg/dL)** | **Age at Peak Bilirubin (days)** | **Birth Weight (g)** | **N** | **Peak Bilirubin (mg/dL)** | **Age at Peak Bilirubin (days)** | **Birth Weight (g)** |
| Poor Sucking | 6 | 31.0  (30.0–40.0) | 6.0  (4.0–7.0) | 2410  (2100–3000) | 3 | 33.0  (21.8–48.0) | 7.0  (5.0–9.0) | 2450  (2300–3000) |
| Seizure | 5 | 32.0  (29.0–38.0) | 4.0  (2.0–5.0) | 3000  (2300–3000) | 4 | 31.5  (30.0–40.5) | 7.0  (7.0–9.0) | 2275  (2000–2725) |
| Lethargy | 5 | 33.0  (30.0–45.0) | 7.0  (5.5–8.0) | 2450  (2100–3000) | 3 | 29.0  (21.8–32.0) | 5.0  (2.0–5.0) | 2300  (2120–3000) |
| Opisthotonus | 2 | 31.0  (30.0–32.0) | 6.0  (5.0–7.0) | 2110  (2100–2120) | 6 | 31.5  (29.0–45.0) | 5.0  (4.0–7.0) | 2725  (2300–3000) |
| Hypertonia | 3 | 32.0  (30.0–33.0) | 6.0  (5.0–7.0) | 2120  (2100–3000) | 5 | 30.0  (29.0–45.0) | 5.0  (4.0–7.0) | 2450  (2300–3000) |
| Hypotonia | 3 | 30.0  (30.0–48.0) | 7.0  (7.0–9.0) | 2100  (1900–2450) | 5 | 32.0  (29.0–33.0) | 4.5  (3.0–5.0) | 3000  (2300–3000) |
| Hemolysis | 5 | 32.0  (29.0–33.0) | 5.0  (3.5–6.5) | 2700  (2300–3000) | 3 | 30.0  (30.0–48.0) | 7.0  (7.0–9.0) | 2100  (1900–2450) |
| Infection | 3 | 32.0  (21.8–48.0) | 5.0  (5.0–9.0) | 2300  (2120–2450) | 5 | 30.0  (30.0–33.0) | 5.5  (3.0–7.0) | 3000  (2100–3000) |
| Dehydration | 2 | 30.0  (30.0–30.0) | 7.0  (7.0–7.0) | 2000  (1900–2100) | 6 | 35.5  (32.0–45.0) | 5.0  (4.0–5.0) | 2725  (2300–3000) |
| Phototherapy | 10 | 37.5  (36.0–38.3) | 32.5  (29.8–41.3) | 2575  (2115–3000) | 0 | — | — | — |
| Exchange Transfusion | 9 | 33.0  (30.0–40.0) | 5.0  (2.0–7.0) | 2450  (2120–3000) | 1 | 21.8  (21.8–21.8) | 9.0  (9.0–9.0) | 2300  (2300–2300) |
| IVIG | 2 | 25.4  (21.8–29.0) | 5.0  (5.0–5.0) | 2650  (2300–3000) | 5 | 33.0  (30.0–40.0) | 5.0  (2.0–7.0) | 2450  (2100–3000) |

*Values are presented as median (IQR). “Present” and “Absent” refer to the presence or absence of each clinical feature. N reflects the number of infants with available data for each variable. Due to incomplete documentation, denominators vary across clinical categories*
