# Supplementary material
Source: Research Square preprint supplement (doi:10.21203/rs.3.rs-8692306/v1)

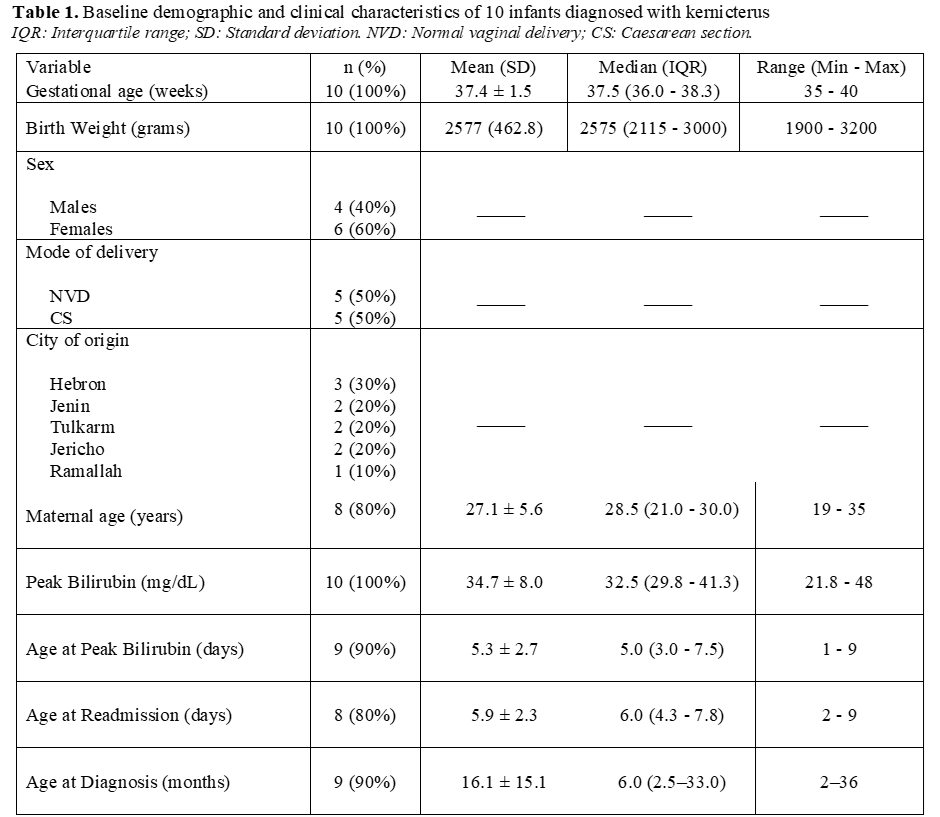

Supplement: Supplementary file 2 [file 4df5703b50f4dcae7e69eb3b.docx]
